# Supplementary material
Source: Springer Nature journal article supplement (https://www.springermedizin.de/resource/supplementary/12885_2011_3006_MOESM4_ESM.pdf/9463488)

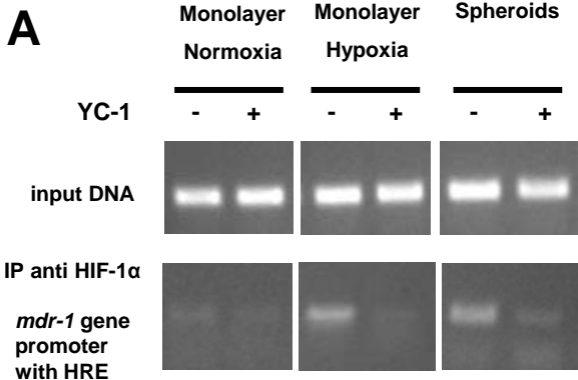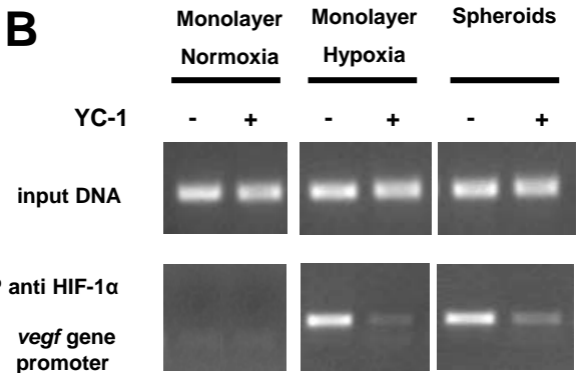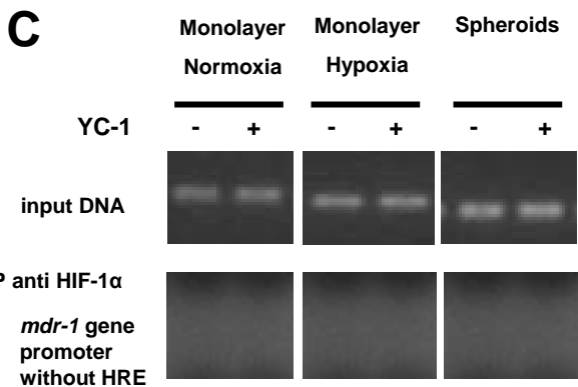

Supplement: MOESM4 [file 9463488]
